# Supplementary material for: An investigation into the therapeutic effects of statins with metformin on polycystic ovary syndrome: a meta-analysis of randomised controlled trials
Source: HighWire-hosted journal article supplement (doi:10.1136/bmjopen-2014-007280), 2015-03-01
Supplement: bmjopen-2014-007280supp.pdf [file bmjopen-2014-007280supp.pdf]

*Meta-analysis 1: Statins versus placebo*

1. LDL-C

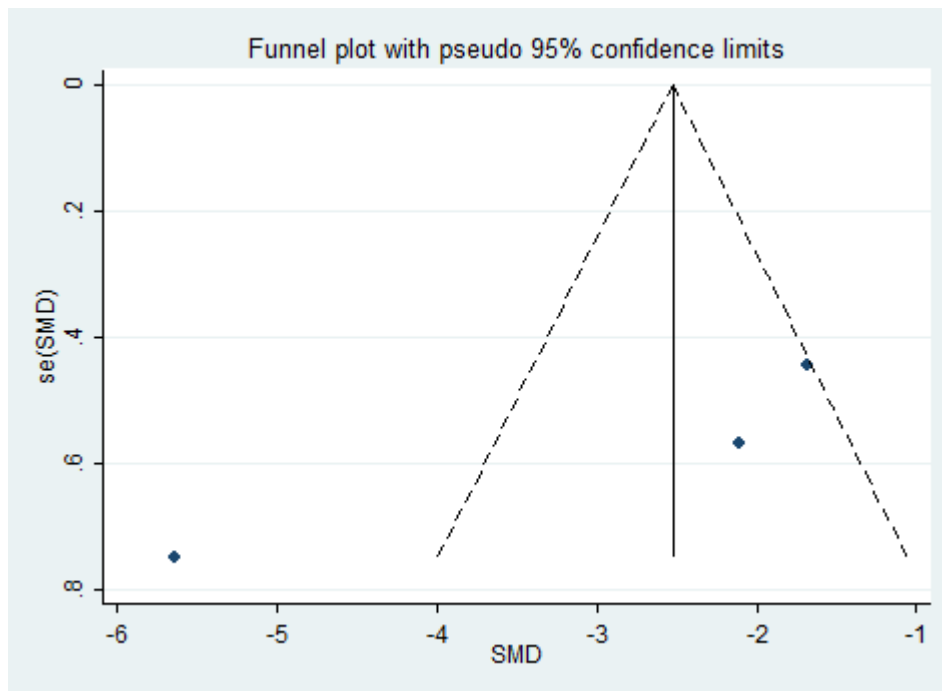

Egger's test  $t = 0.242 (>0.05)$

2. TC

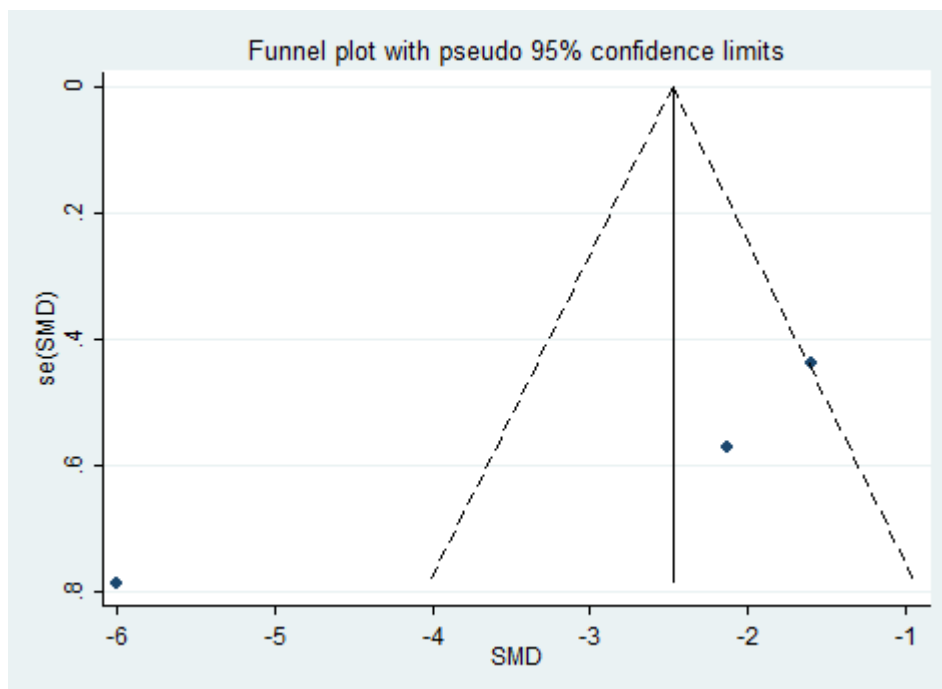

Egger's test  $t = 0.215 (>0.05)$

### 3. TG

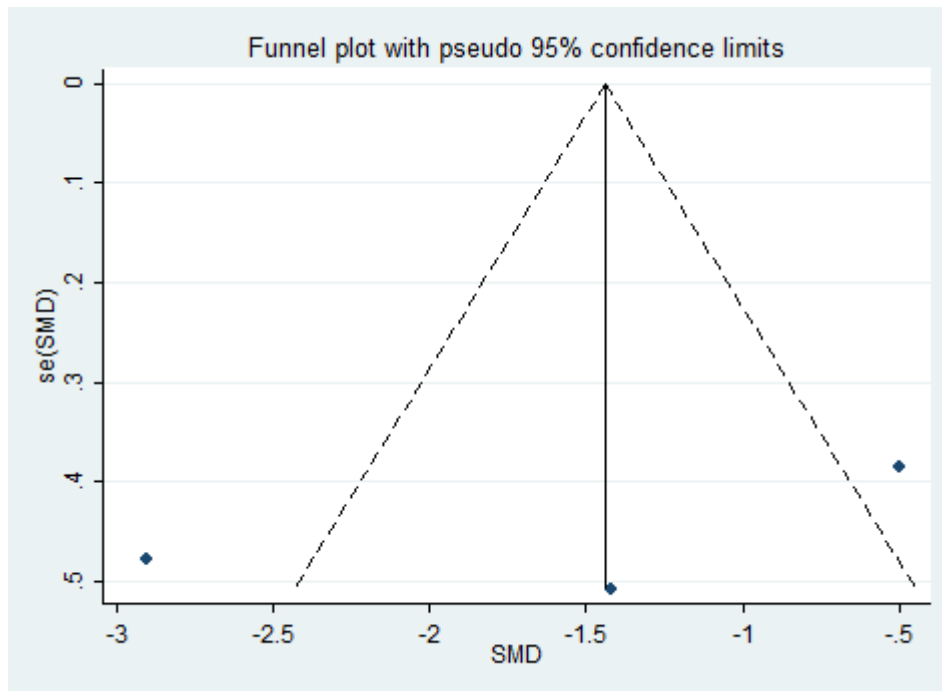

Egger's test  $t = 0.496 (>0.05)$

### 4. CRP

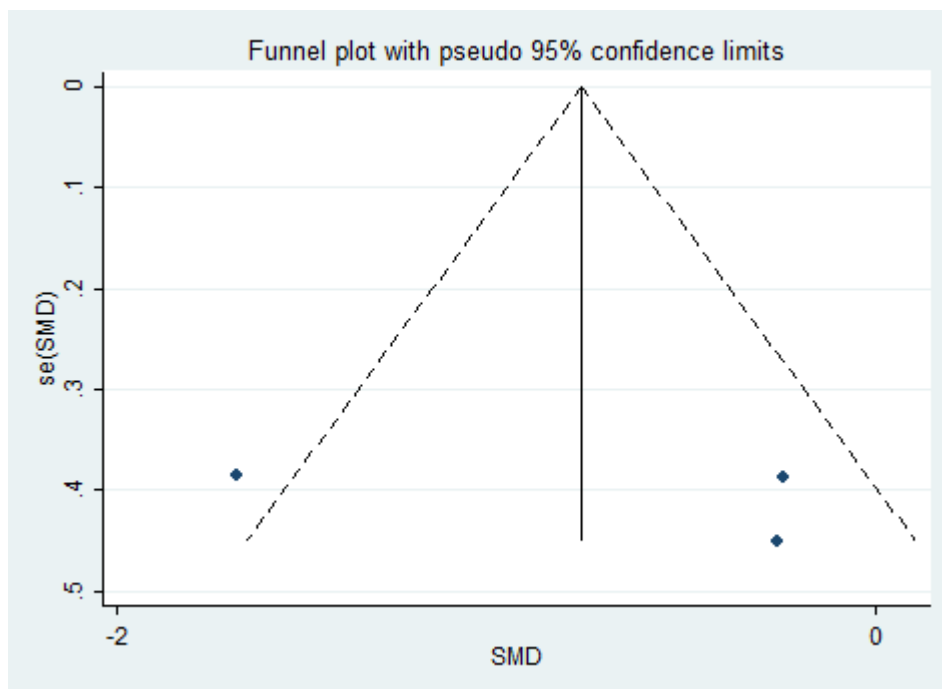

Egger's test  $t = 0.691 (>0.05)$

5. total testosterone

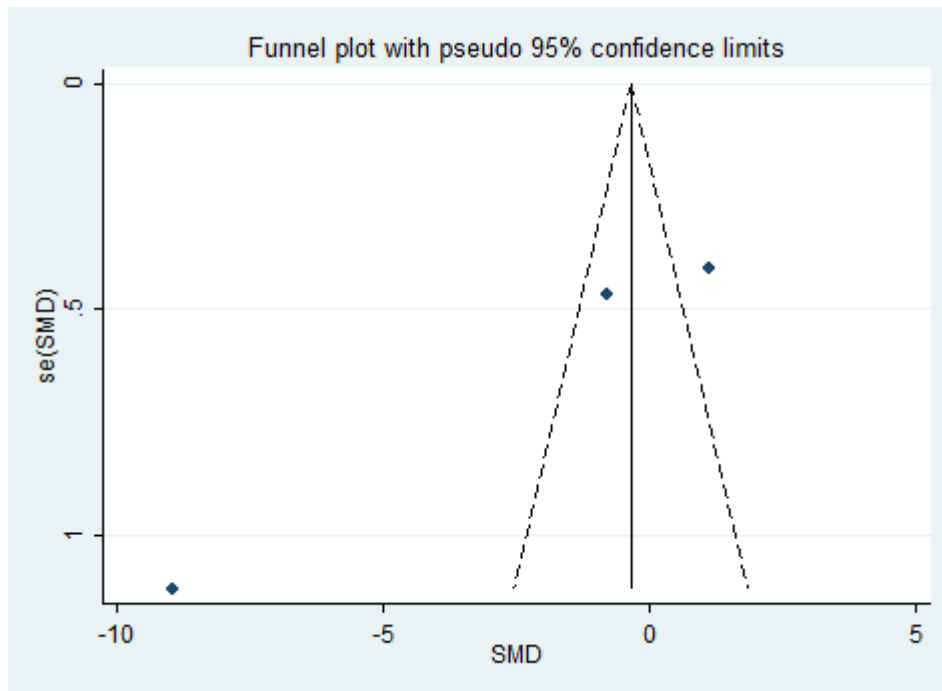

Egger's test  $t = 0.135 (>0.05)$

6. FBG

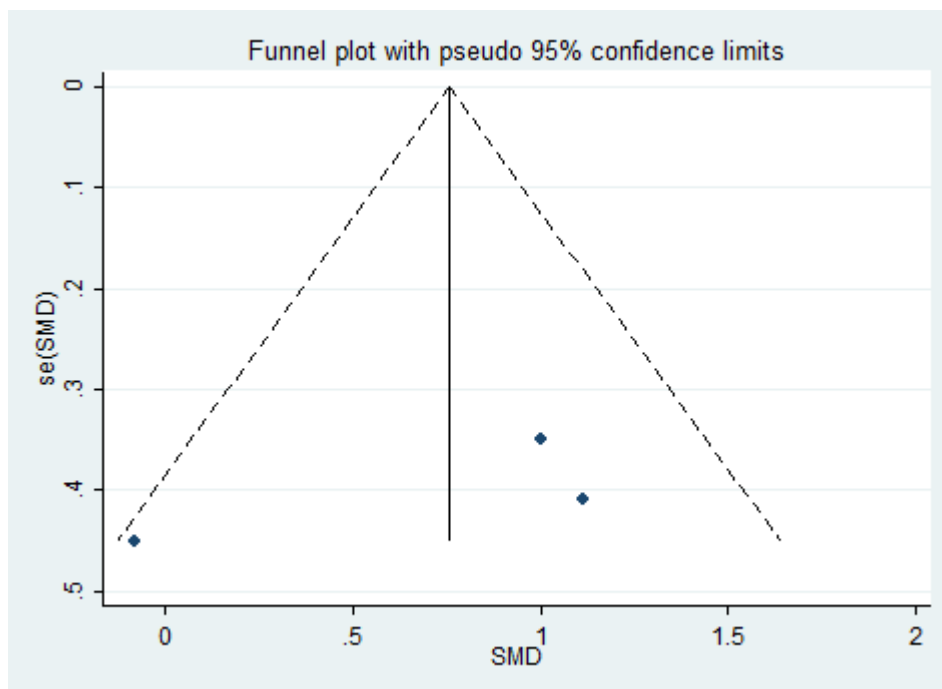

Egger's test  $t = 0.480 (>0.05)$

## 7. F-INS

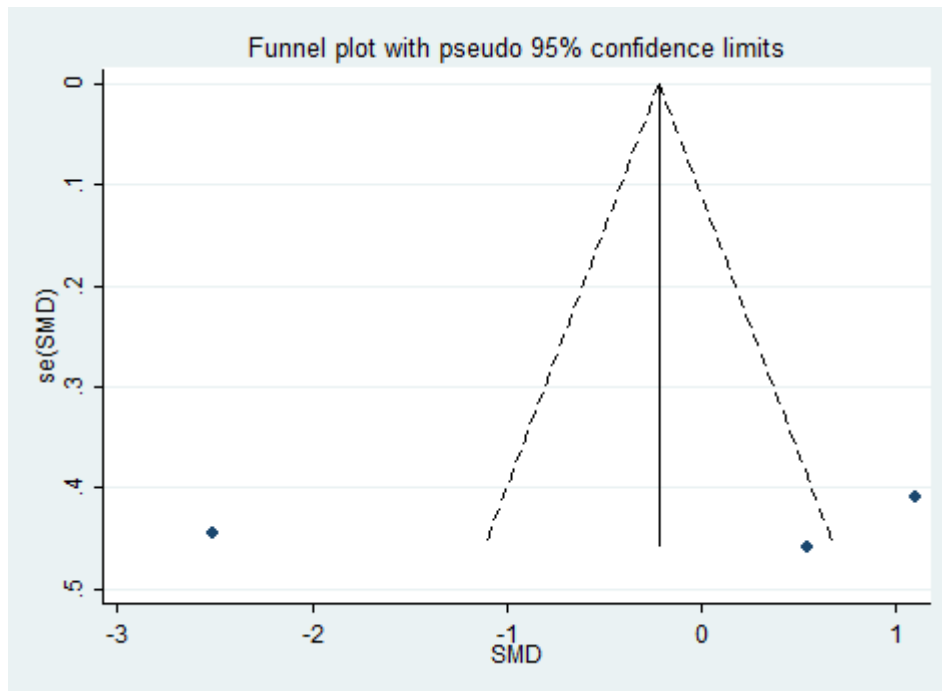

Egger's test  $t = 0.704$  ( $>0.05$ )

## Meta-analysis 2: Statin + metformin versus metformin

### 1. LDL-C

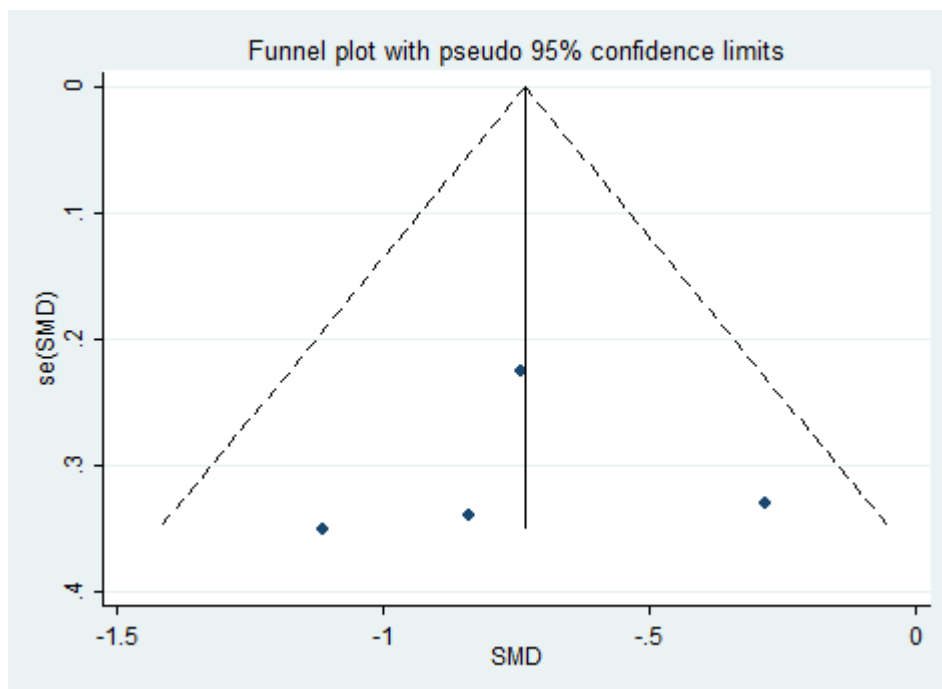

Egger's test  $t = 0.921$  ( $>0.05$ )

2. TC

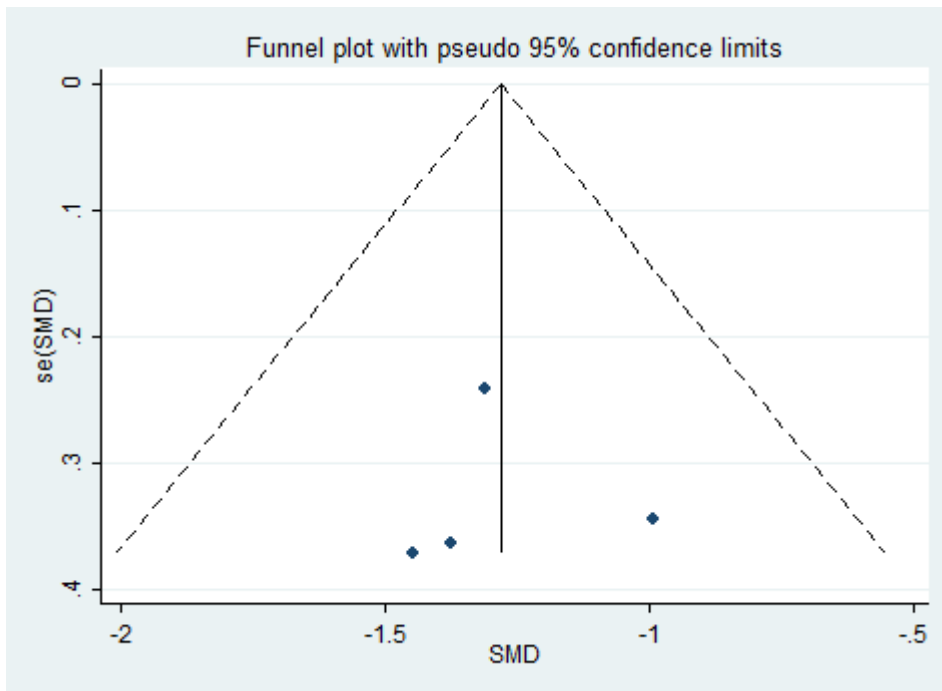

Egger's test  $t = 0.975 (>0.05)$

3. TG

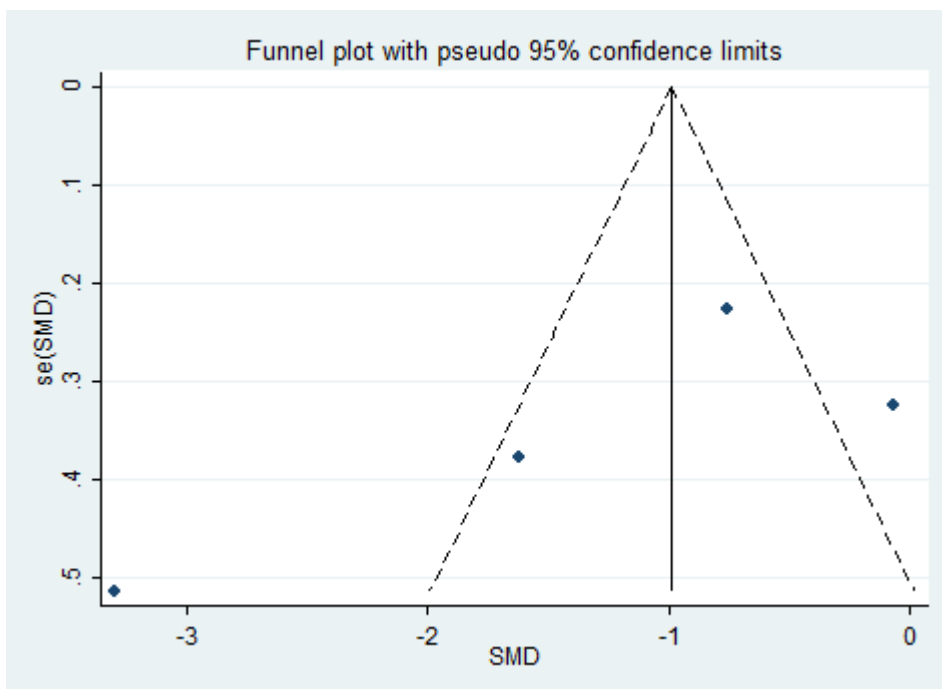

Egger's test  $t = 0.282 (>0.05)$

#### 4. CRP

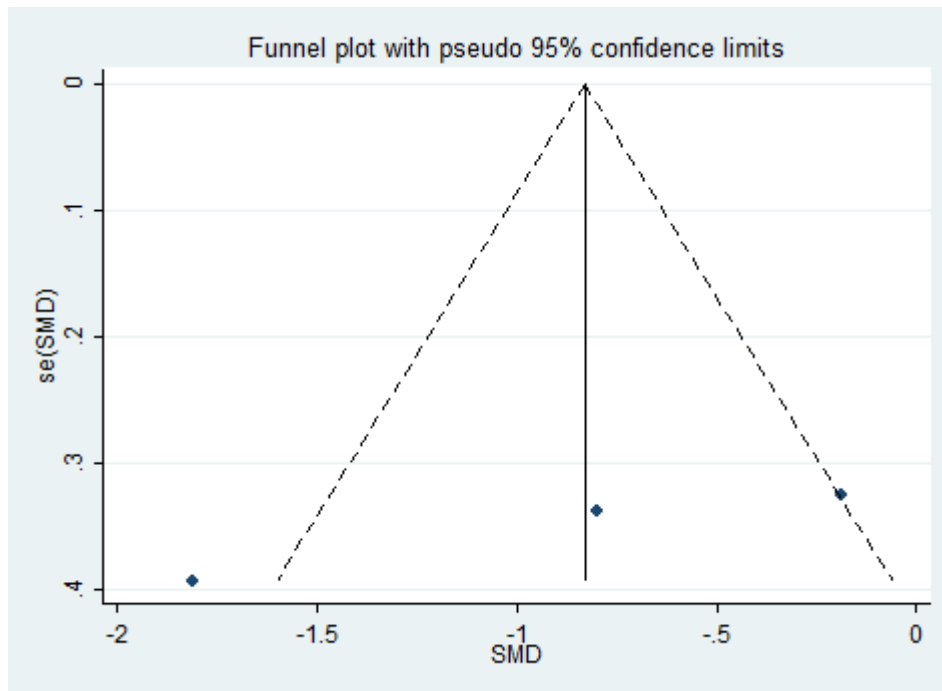

Egger's test  $t = 0.144 (>0.05)$

#### 5. total testosterone

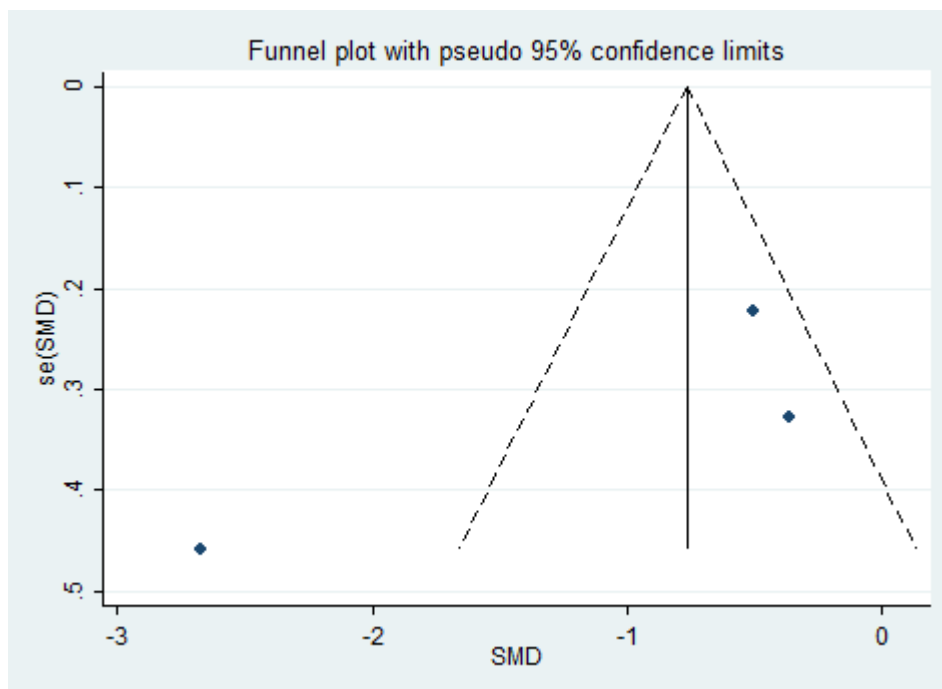

Egger's test  $t = 0.417 (>0.05)$

## 6. FBG

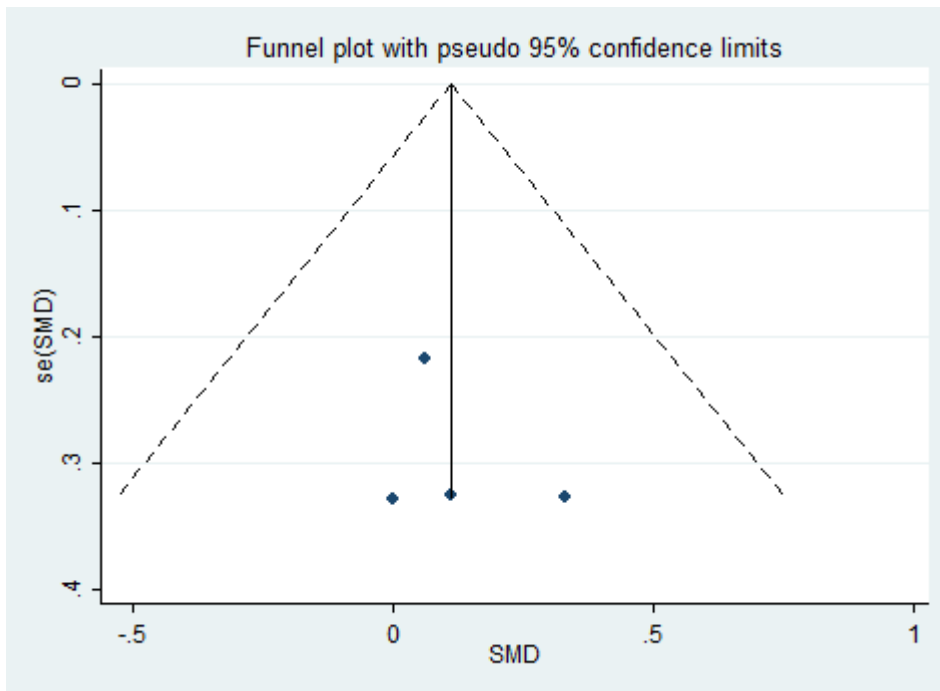

Egger's test  $t = 0.613 (>0.05)$

## 7. F-INS

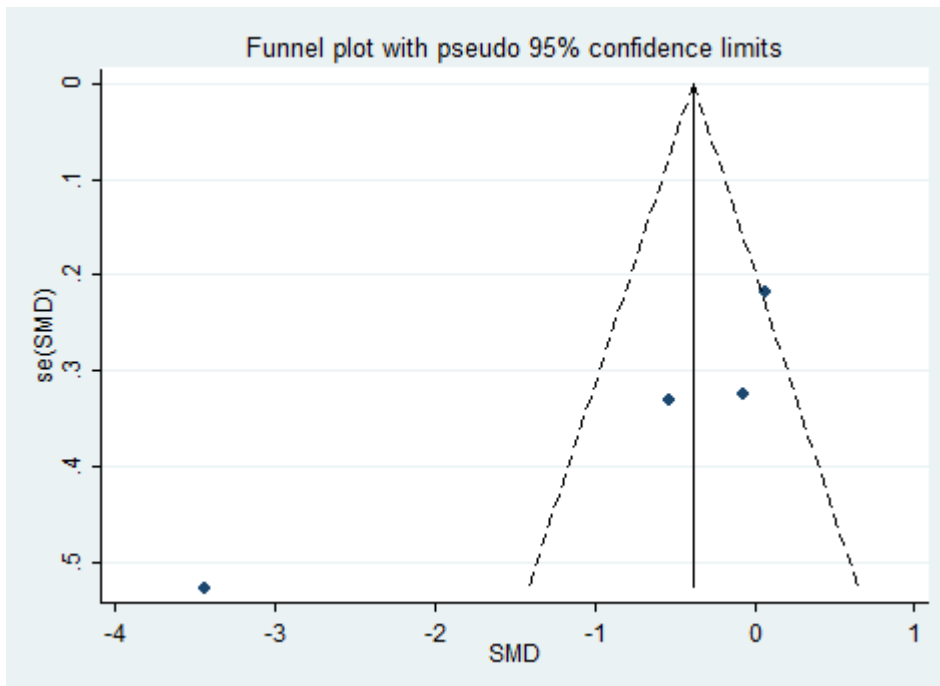

Egger's test  $t = 0.108 (>0.05)$
